# Supplementary material for: Genome-wide identification and expression analysis of fibrillin (FBN) gene family in tomato (Solanum lycopersicum L.)
Source: PeerJ. 2022 May 9;10:e13414. doi: 10.7717/peerj.13414 (PMC9097668; doi:10.7717/peerj.13414)
Supplement: Supplemental Information 1 [file peerj-10-13414-s001.xlsx]

## Sheet: Sheet1
Table S1. Primers used in qRT-PCR analysis of SlFBNs.
Gene name	Forward primer (5’-3’)	Reverse primer (5’-3’)
SlFBN1	CCAAGACACAGCTTCCTCGG	ACACTGCCAGCATCTCCTCT
SlFBN2a	GAGGCAGCAAATCCAACTCCA	CCCACAGCCAGAAGAGGTAAC
SlFBN2b	TCCTCTGGAAAACGCTGTGG	AAAAGCCCACCATCGCCTCT
SlFBN3a	GCCACTCCTGAAGATCAAAAGCT	TCCCACTTTCCATTCAGTAAGCT
SlFBN3b	TGAACCTCTTGATCGTGGCG	GAGTTGAGTTGAGGGGCTCC
SlFBN4	CCAGATCAGTTCAGGCCACC	AGCTCTCCTCTGTCTCCCCT
SlFBN5	CCTTGGCATCTTCAACCCACA	TGTTGCCCTTGTCATCTTTACCT
SlFBN6	ATCGGAGTGCATTTGGTCGC	CCTTGAGTTCAGGCGGTTCG
SlFBN7a	AGCATTGGTCACTGGGAAGAC	GGCGTCGGATTGAGCTTCTC
SlFBN7b	GCTGGAGGTTTTGAGGCAGT	TGGGTCGTGGTGTCGGATTA
SlFBN8	AAGTTGGACGGAACATGGCG	CCACGGGATTCATTCTGGCA
SlFBN9	AGTTGCATCTTCTCAGCGTGT	GTCTCAAACCACCCTTGTCCA
SlFBN10	GCGCTGCTTCACCTCAACAA	CTGCCACCGACCCTCTATCA
SlFBN11	GGCAACAGCAGCGAAGTAGG	AGAAGGCTGTCGAAGGGTCA
SlActin	TCCTAGTATTGTTGGCCGCC	CTTCATCTCCCACATAGGCG
