# Supplementary material for: Genome-wide identification and expression analysis of fibrillin (FBN) gene family in tomato (Solanum lycopersicum L.)
Source: PeerJ. 2022 May 9;10:e13414. doi: 10.7717/peerj.13414 (PMC9097668; doi:10.7717/peerj.13414)
Supplement: Supplemental Information 2 [file peerj-10-13414-s002.xlsx]

## Sheet: Sheet1
Table S2. Physical and chemical properties of FBN family in tomato.
Gene accession No.	Gene name	Location in chromosome	Length of amino acids (aa)	Molecular weight (kDa)		pI	Hydrophobicity	Subcellular localization
Solyc02g081170.4.1	SlFBN1	SL4.0ch02:4321911243221005-	354		38.95	5.68	-0.116	Chloroplast
Solyc08g005220.4.1	SlFBN2a	SL4.0ch08:5859993658603288+	467		51.88	4.73	-0.464	Chloroplast
Solyc08g076480.3.1	SlFBN2b	SL4.0ch08:154690157071-	344		37.48	4.65	-0.319	Chloroplast
Solyc01g104320.4.1	SlFBN3a	SL4.0ch01:918248922538+	221		24.73	9.72	-0.304	Chloroplast
Solyc11g044530.2.1	SlFBN3b	SL4.0ch09:6593675265941494-	234		26.45	9.18	-0.345	Nuclear
Solyc09g090330.3.1	SlFBN4	SL4.0ch11:283117286184-	276		30.08	6.25	-0.283	Chloroplast
Solyc11g005340.3.1	SlFBN5	SL4.0ch11:3126294331271513-	256		28.96	9.34	-0.268	Chloroplast
Solyc08g006160.4.1	SlFBN6	SL4.0ch10:84858658487347+	262		29.22	9.44	-0.319	Chloroplast
Solyc03g062790.3.1	SlFBN7a	SL4.0ch01:8504128385044376-	295		32.62	7.55	-0.186	Chloroplast
Solyc10g080490.2.1	SlFBN7b	SL4.0ch08:5582141655827082-	296		33.11	7.69	-0.084	Chloroplast
Solyc08g068590.4.1	SlFBN8	SL4.0ch08:895345898426-	274		30.5	8.35	0.074	Chloroplast
Solyc10g018590.2.1	SlFBN9	SL4.0ch10:6085691260860766-	206		23.43	8.99	-0.303	Mitochondrial
Solyc01g006330.4.1	SlFBN10	SL4.0ch03:2827227328286618-	428		48.02	9.1	-0.225	Chloroplast
Solyc03g083420.4.1	SlFBN11	SL4.0ch03:4787030547876914+	541		61.35	9.62	-0.221	Nuclear
