# Supplementary material for: Genome-wide identification and expression analysis of fibrillin (FBN) gene family in tomato (Solanum lycopersicum L.)
Source: PeerJ. 2022 May 9;10:e13414. doi: 10.7717/peerj.13414 (PMC9097668; doi:10.7717/peerj.13414)
Supplement: Supplemental Information 3 [file peerj-10-13414-s003.xlsx]

## Sheet: Sheet1
Table S3. Homologous FBN gene pairs between tomato and Arabidopsis.
Homologous SlFBN gene	Homologous AtFBN gene
SlFBN1	AtFBN1b
SlFBN1	AtFBN1a
SlFBN2a	AtFBN2
SlFBN2b	AtFBN2
SlFBN4	AtFBN4
SlFBN5	AtFBN5
SlFBN7b	AtFBN7a
SlFBN7b	AtFBN7b
