# Supplementary material for: Genome-wide identification and expression analysis of fibrillin (FBN) gene family in tomato (Solanum lycopersicum L.)
Source: PeerJ. 2022 May 9;10:e13414. doi: 10.7717/peerj.13414 (PMC9097668; doi:10.7717/peerj.13414)
Supplement: Supplemental Information 4 [file peerj-10-13414-s004.xlsx]

## Sheet: Sheet1
Table S4. The 10 conserved motifs of SlFBN family proteins.
Motif	Sequence of motif	Length/aa
Motif1	HRAQGWLEITYLDDDMRISRGDAG	24
Motif2	VDPPHWCDLLDGKWRLMYTT	20
Motif3	LKQCLLDAIYGTDRGLRATSEDQKEADE	28
Motif4	PVATNKFSATAKFEVRGPSRMQVEYKEGIFKPPEIDEDIVPPENMDAFGQ	50
Motif5	YQAINVDTLRAQNMEGWPFFNQ	22
Motif6	AFKDAGGFEAVITGKTKDVQCIDVNERII	29
Motif7	MAMLIQNLVPPFACRRTTYT	20
Motif8	QDDDDADDKMFEFVDEWGEKSKPEPGPVTKLADSDPPEDDDEWG	44
Motif9	YRNVRKMLRVCRAM	14
Motif10	NPLQQSPVPIRNAVA	15
