# Supplementary material for: Genome-wide identification and expression analysis of fibrillin (FBN) gene family in tomato (Solanum lycopersicum L.)
Source: PeerJ. 2022 May 9;10:e13414. doi: 10.7717/peerj.13414 (PMC9097668; doi:10.7717/peerj.13414)
Supplement: Supplemental Information 5 — The expression levels of SlFBNs were tested by qRT-PCR and estimated by the 2−ΔΔCT method. Leaf-1, Leaf-2 and Leaf-3 represent young, mature and senescent leaves, respectively. The error bars show the standard error (SE) of three biological replicates. The p value was calculated through t-test. Asterisk indicate the significant difference compared with control (Leaf-1). * and ** indicate p＜0.05 and p＜0.01, respectively. [file peerj-10-13414-s005.xlsx]

## Sheet: Sheet1
Table S5. Raw data of SlFBNs expressions at different development stages of tomato leaf for data analyses and preparation for Figure 7.
Gene Name	Sample Name	Cт	∆CT	∆∆CT	2-∆∆CT	Average (2-∆∆CT)	SE	P-value	Asterisk
SlFBN1	Leaf-1-Re1	21.462	-0.178066	0.0520744	0.964548	0.982966	0.0177663
	Leaf-1-Re2	21.614	-0.230141	0	1
	Leaf-1-Re3	21.6442	-0.207384	0.0227566	0.98435
	Leaf-2-Re1	21.0317	-0.826918	-0.596777	1.51233	1.53475	0.0268782	7.69125e-06	**
	Leaf-2-Re2	21.0375	-0.841198	-0.611057	1.52738
	Leaf-2-Re3	21.0555	-0.875889	-0.645748	1.56455
	Leaf-3-Re1	20.903	-0.712831	-0.482691	1.39735	1.32565	0.0792368	0.00186351	*
	Leaf-3-Re2	21.0015	-0.651312	-0.421171	1.33901
	Leaf-3-Re3	21.247	-0.541149	-0.311008	1.24057
SlFBN2a	Leaf-1-Re1	24.2945	2.65449	0	1	0.886424	0.121256
	Leaf-1-Re2	24.6498	2.80562	0.151127	0.900547
	Leaf-1-Re3	24.9044	3.05284	0.398352	0.758725
	Leaf-2-Re1	23.4983	1.63975	-1.01474	2.02053	1.78682	0.240786	0.00443707	**
	Leaf-2-Re2	23.9107	2.032	-0.622496	1.53954
	Leaf-2-Re3	23.7376	1.80619	-0.848302	1.80038
	Leaf-3-Re1	24.5293	2.91347	0.258976	0.835681	0.826838	0.0298201	0.454963
	Leaf-3-Re2	24.5397	2.88686	0.232368	0.851236
	Leaf-3-Re3	24.7762	2.98801	0.333523	0.793596
SlFBN2b	Leaf-1-Re1	21.7358	0.0957508	0.0934353	0.937288	0.963074	0.0328064
	Leaf-1-Re2	21.8465	0.00231552	0	1
	Leaf-1-Re3	21.9249	0.0733814	0.0710659	0.951934
	Leaf-2-Re1	21.8927	0.0341454	0.0318298	0.978179	0.932419	0.0681555	0.521404
	Leaf-2-Re2	21.9325	0.05373	0.0514145	0.96499
	Leaf-2-Re3	22.1613	0.229856	0.227541	0.854089
	Leaf-3-Re1	21.6156	-0.000274658	-0.00259018	1.0018	1.01363	0.020644	0.0867553
	Leaf-3-Re2	21.6528	-3.62396e-05	-0.00235176	1.00163
	Leaf-3-Re3	21.7374	-0.0507545	-0.0530701	1.03747
SlFBN3a	Leaf-1-Re1	26.6291	4.9891	0.0466995	0.968149	0.960175	0.0443535
	Leaf-1-Re2	26.7866	4.9424	0	1
	Leaf-1-Re3	26.9263	5.0747	0.132301	0.912375
	Leaf-2-Re1	25.9861	4.12748	-0.814919	1.7592	1.42362	0.314452	0.0648227
	Leaf-2-Re2	26.3607	4.48201	-0.460388	1.37591
	Leaf-2-Re3	26.6902	4.75876	-0.183641	1.13575
	Leaf-3-Re1	26.0358	4.41994	-0.522465	1.43641	1.46489	0.0605523	0.000310647	**
	Leaf-3-Re2	26.0855	4.43262	-0.509785	1.42384
	Leaf-3-Re3	26.1129	4.32469	-0.617708	1.53444
SlFBN3b	Leaf-1-Re1	23.9683	2.32827	0	1	0.865093	0.221311
	Leaf-1-Re2	24.1934	2.3492	0.0209274	0.985599
	Leaf-1-Re3	24.8937	3.04214	0.713873	0.609681
	Leaf-2-Re1	24.5046	2.64605	0.317778	0.802305	0.658074	0.185027	0.281746
	Leaf-2-Re2	24.676	2.79728	0.469009	0.72246
	Leaf-2-Re3	25.4134	3.48202	1.15375	0.449456
	Leaf-3-Re1	23.5206	1.90476	-0.423514	1.34119	1.7552	0.367203	0.0228412	*
	Leaf-3-Re2	23.0682	1.41531	-0.912962	1.88291
	Leaf-3-Re3	23.0868	1.29865	-1.02962	2.04149
SlFBN4	Leaf-1-Re1	21.7506	0.110611	0.145885	0.903824	0.950103	0.0481897
	Leaf-1-Re2	21.8089	-0.0352745	0	1
	Leaf-1-Re3	21.8956	0.0440731	0.0793476	0.946486
	Leaf-2-Re1	21.743	-0.115547	-0.0802727	1.05722	1.01492	0.083789	0.310041
	Leaf-2-Re2	21.747	-0.131708	-0.0964336	1.06913
	Leaf-2-Re3	22.0189	0.0875111	0.122786	0.918413
	Leaf-3-Re1	21.2575	-0.358337	-0.323063	1.25098	1.23034	0.122232	0.0209411	*
	Leaf-3-Re2	21.4813	-0.171591	-0.136316	1.0991
	Leaf-3-Re3	21.3297	-0.458507	-0.423232	1.34093
SlFBN5	Leaf-1-Re1	22.8474	1.20734	0.187815	0.877935	0.945862	0.0621901
	Leaf-1-Re2	22.8637	1.01953	0	1
	Leaf-1-Re3	22.9305	1.07895	0.0594177	0.959651
	Leaf-2-Re1	22.2606	0.402025	-0.617502	1.53422	1.53717	0.00498547	8.06157e-05	**
	Leaf-2-Re2	22.2806	0.401875	-0.617653	1.53438
	Leaf-2-Re3	22.3253	0.393854	-0.625673	1.54293
	Leaf-3-Re1	21.9626	0.346718	-0.67281	1.59417	1.50543	0.0904712	0.000908654	**
	Leaf-3-Re2	22.1733	0.520433	-0.499094	1.41333
	Leaf-3-Re3	22.2143	0.426138	-0.59339	1.50879
SlFBN6	Leaf-1-Re1	19.2831	-2.35691	0	1	0.834593	0.143286
	Leaf-1-Re2	19.8923	-1.95188	0.405037	0.755217
	Leaf-1-Re3	19.9124	-1.93911	0.417809	0.748561
	Leaf-2-Re1	19.1581	-2.70048	-0.343563	1.26889	1.33655	0.0728612	0.00565965	**
	Leaf-2-Re2	19.1136	-2.76517	-0.40826	1.32708
	Leaf-2-Re3	19.075	-2.85637	-0.499459	1.41368
	Leaf-3-Re1	18.883	-2.73289	-0.37598	1.29772	1.71464	0.696155	0.0985748
	Leaf-3-Re2	18.8868	-2.76606	-0.409142	1.3279
	Leaf-3-Re3	18.0988	-3.68937	-1.33245	2.5183
SlFBN7a	Leaf-1-Re1	22.642	1.00198	0	1	0.971438	0.0256131
	Leaf-1-Re2	22.8993	1.05517	0.0531883	0.963804
	Leaf-1-Re3	22.9268	1.07521	0.0732269	0.95051
	Leaf-2-Re1	23.145	1.28641	0.28443	0.821066	1.0306	0.345759	0.78226
	Leaf-2-Re2	22.365	0.486286	-0.515697	1.42969
	Leaf-2-Re3	23.1831	1.2517	0.249717	0.841062
	Leaf-3-Re1	22.1778	0.561882	-0.440102	1.3567	0.955819	0.35493	0.943053
	Leaf-3-Re2	23.2079	1.55503	0.553044	0.681581
	Leaf-3-Re3	23.0604	1.27223	0.270248	0.829177
SlFBN7b	Leaf-1-Re1	23.2854	1.64534	0.0643139	0.9564	0.907752	0.123952
	Leaf-1-Re2	23.4252	1.58102	0	1
	Leaf-1-Re3	23.8156	1.964	0.382975	0.766855
	Leaf-2-Re1	23.6101	1.75153	0.170509	0.888529	0.779967	0.0940482	0.22796
	Leaf-2-Re2	23.9272	2.04842	0.467402	0.723266
	Leaf-2-Re3	23.9702	2.0388	0.457777	0.728107
	Leaf-3-Re1	23.0634	1.44757	-0.133457	1.09692	0.82881	0.232233	0.630892
	Leaf-3-Re2	23.7687	2.11586	0.534842	0.690234
	Leaf-3-Re3	23.8853	2.09708	0.516062	0.699278
SlFBN8	Leaf-1-Re1	22.4776	0.837585	0	1	0.924689	0.0683726
	Leaf-1-Re2	22.8217	0.977533	0.139948	0.907552
	Leaf-1-Re3	22.8958	1.04429	0.206703	0.866515
	Leaf-2-Re1	22.8992	1.04059	0.203005	0.868739	0.873516	0.00759581	0.267073
	Leaf-2-Re2	22.918	1.03927	0.201687	0.869533
	Leaf-2-Re3	22.9497	1.01829	0.1807	0.882275
	Leaf-3-Re1	22.3024	0.686485	-0.1511	1.11042	1.11183	0.0254276	0.0113038	*
	Leaf-3-Re2	22.3699	0.717047	-0.120539	1.08714
	Leaf-3-Re3	22.4393	0.651165	-0.18642	1.13794
SlFBN9	Leaf-1-Re1	24.4161	2.77611	0.03825	0.973836	0.937374	0.086803
	Leaf-1-Re2	24.582	2.73786	0	1
	Leaf-1-Re3	24.8439	2.99234	0.254482	0.838288
	Leaf-2-Re1	24.3017	2.44309	-0.294776	1.22669	1.32682	0.166793	0.0230152	*
	Leaf-2-Re2	24.0131	2.1344	-0.603466	1.51936
	Leaf-2-Re3	24.3655	2.43406	-0.303803	1.23439
	Leaf-3-Re1	23.6389	2.02298	-0.714884	1.64135	1.60705	0.0446871	0.000287445	**
	Leaf-3-Re2	23.6918	2.03895	-0.698914	1.62328
	Leaf-3-Re3	23.8877	2.09954	-0.638319	1.55651
SlFBN10	Leaf-1-Re1	24.7492	3.10921	0.115208	0.923249	0.960494	0.0384252
	Leaf-1-Re2	24.8382	2.994	0	1
	Leaf-1-Re3	24.9071	3.05555	0.0615501	0.958234
	Leaf-2-Re1	24.3459	2.48732	-0.506683	1.42078	1.4314	0.0185701	4.41641e-05	**
	Leaf-2-Re2	24.3663	2.48752	-0.506479	1.42058
	Leaf-2-Re3	24.3865	2.45512	-0.538879	1.45284
	Leaf-3-Re1	24.4163	2.80041	-0.193594	1.14361	1.06926	0.131324	0.240598
	Leaf-3-Re2	24.7709	3.11801	0.124011	0.917633
	Leaf-3-Re3	24.5849	2.7967	-0.197298	1.14655
SlFBN11	Leaf-1-Re1	24.9112	3.27115	0.19511	0.873506	0.945209	0.0649208
	Leaf-1-Re2	24.9202	3.07604	0	1
	Leaf-1-Re3	24.9833	3.13175	0.0557079	0.962122
	Leaf-2-Re1	25.8818	4.02322	0.947178	0.518646	0.491615	0.0261853	0.000358967	**
	Leaf-2-Re2	25.9844	4.10568	1.02964	0.489833
	Leaf-2-Re3	26.1079	4.1765	1.10046	0.466367
	Leaf-3-Re1	25.8951	4.27925	1.20321	0.434307	0.444143	0.0191708	0.000213338	**
	Leaf-3-Re2	25.9402	4.28732	1.21128	0.431886
	Leaf-3-Re3	25.9651	4.17691	1.10087	0.466235
SlActin	Leaf-1-Re1	21.64
	Leaf-1-Re2	21.8442
	Leaf-1-Re3	21.8516
	Leaf-2-Re1	21.8586
	Leaf-2-Re2	21.8787
	Leaf-2-Re3	21.9314
	Leaf-3-Re1	21.6159
	Leaf-3-Re2	21.6529
	Leaf-3-Re3	21.7882
