# Supplementary material for: Genome-wide identification and expression analysis of fibrillin (FBN) gene family in tomato (Solanum lycopersicum L.)
Source: PeerJ. 2022 May 9;10:e13414. doi: 10.7717/peerj.13414 (PMC9097668; doi:10.7717/peerj.13414)
Supplement: Supplemental Information 6 — The expression levels of SlFBNs were tested by qRT-PCR and estimated by the 2−ΔΔCT method. 0, 6, 12 and 24 h represent 0, 6, 12 and 24 h under ABA treatment, respectively. The error bars show the standard error (SE) of three biological replicates. The p value was calculated through t-test. Asterisk indicate the significant difference compared with control (0 h). * and ** indicate p＜0.05 and p＜0.01, respectively. [file peerj-10-13414-s006.xlsx]

## Sheet: Sheet1
Table S6. Raw data of SlFBNs expressions under ABA treatment for data analyses and preparation for Figure 9.
Gene Name	Sample Name	Cт	∆CT	∆∆CT	2-∆∆CT	Average (2-∆∆CT)	SE	P-value	Asterisk
SlFBN1	0h-Re1	22.7472	0.358011	0	1	0.966933	0.0287444
	0h-Re2	22.883	0.435177	0.0771656	0.947918
	0h-Re3	22.9381	0.427645	0.0696335	0.95288
	ABA-6h-Re1	20.9026	-1.98163	-0.62462	1.54181	1.53551	0.0170115	7.87914e-06	**
	ABA-6h-Re2	20.9255	-2.01247	-0.630844	1.54847
	ABA-6h-Re3	20.9642	-1.98833	-0.600502	1.51624
	ABA-12h-Re1	22.2751	-1.11062	0.238384	0.847694	0.952746	0.0933133	0.813704
	ABA-12h-Re2	22.2807	-1.46157	-0.0370579	1.02602
	ABA-12h-Re3	22.3485	-1.52831	0.022501	0.984524
	ABA-24h-Re1	21.1824	-1.47195	-1.29931	2.46111	2.51054	0.0432101	8.49686e-07	**
	ABA-24h-Re2	21.209	-1.53616	-1.33878	2.52937
	ABA-24h--Re3	21.2476	-1.52458	-1.34547	2.54114
	CK-6h-Re1	21.4671	-1.35701
	CK-6h-Re2	21.5003	-1.38163
	CK-6h-Re3	21.5034	-1.38782
	CK-12h-Re1	23.0161	-1.349
	CK-12h-Re2	23.0394	-1.42452
	CK-12h-Re3	23.0629	-1.55081
	CK-24h-Re1	22.4402	-0.17264
	CK-24h-Re2	22.5289	-0.197378
	CK-24h-Re3	22.7131	-0.179104
SlFBN2a	0h-Re1	24.3587	1.96946	0.0475273	0.967593	0.942284	0.0737046
	0h-Re2	24.3698	1.92193	0	1
	0h-Re3	24.6512	2.14076	0.218834	0.85926
	ABA-6h-Re1	23.6859	0.801661	0.203241	0.868597	0.928004	0.0714406	0.821423
	ABA-6h-Re2	23.9361	0.998171	0.139013	0.90814
	ABA-6h-Re3	24.1664	1.21388	-0.0104561	1.00727
	ABA-12h-Re1	24.2148	0.829121	0.475721	0.719107	0.780826	0.175229	0.215229
	ABA-12h-Re2	24.2274	0.485201	0.0312614	0.978564
	ABA-12h-Re3	24.8996	1.0228	0.633059	0.644808
	ABA-24h-Re1	23.999	1.34468	-0.283722	1.21733	1.24847	0.0563487	0.00463384	**
	ABA-24h-Re2	24.0029	1.2578	-0.393433	1.31351
	ABA-24h--Re3	24.492	1.71985	-0.280434	1.21456
	CK-6h-Re1	23.4226	0.598419
	CK-6h-Re2	23.741	0.859158
	CK-6h-Re3	24.1155	1.22433
	CK-12h-Re1	24.7185	0.353399
	CK-12h-Re2	24.9178	0.453939
	CK-12h-Re3	25.0034	0.389742
	CK-24h-Re1	24.2412	1.6284
	CK-24h-Re2	24.3775	1.65123
	CK-24h-Re3	24.8925	2.00028
SlFBN2b	0h-Re1	22.3739	-0.0153446	0.0322094	0.977922	1.0015	0.0243693
	0h-Re2	22.4003	-0.047554	0	1
	0h-Re3	22.4251	-0.0854149	-0.0378609	1.02659
	ABA-6h-Re1	21.348	-1.53626	-0.500944	1.41514	1.44571	0.0268956	2.9275e-05	**
	ABA-6h-Re2	21.4076	-1.53033	-0.551634	1.46574
	ABA-6h-Re3	21.464	-1.48849	-0.542244	1.45624
	ABA-12h-Re1	21.8284	-1.55732	0.463039	0.725456	0.857883	0.120262	0.112562
	ABA-12h-Re2	21.8616	-1.88062	0.171534	0.887898
	ABA-12h-Re3	21.8755	-2.00137	0.0584507	0.960295
	ABA-24h-Re1	21.8923	-0.762075	-0.612337	1.52873	1.67944	0.130965	0.000914052	**
	ABA-24h-Re2	21.9262	-0.818951	-0.802351	1.74394
	ABA-24h--Re3	21.9299	-0.84223	-0.820194	1.76564
	CK-6h-Re1	21.7888	-1.03531
	CK-6h-Re2	21.9032	-0.978697
	CK-6h-Re3	21.9449	-0.946245
	CK-12h-Re1	22.3447	-2.02036
	CK-12h-Re2	22.4117	-2.05215
	CK-12h-Re3	22.5539	-2.05982
	CK-24h-Re1	22.4631	-0.149738
	CK-24h-Re2	22.7097	-0.0165997
	CK-24h-Re3	22.8702	-0.0220356
SlFBN3a	0h-Re1	26.7374	4.34822	0	1	0.957413	0.0539146
	0h-Re2	26.8319	4.38408	0.0358658	0.975446
	0h-Re3	27.0158	4.50537	0.157152	0.896794
	ABA-6h-Re1	25.9248	3.04051	-0.137789	1.10022	1.07016	0.135335	0.251152
	ABA-6h-Re2	26.0488	3.11085	-0.248463	1.18794
	ABA-6h-Re3	26.5856	3.6331	0.116655	0.922323
	ABA-12h-Re1	25.0293	1.64357	-0.717778	1.64465	1.7931	0.43274	0.0294007	*
	ABA-12h-Re2	24.8545	1.11225	-1.18937	2.28053
	ABA-12h-Re3	25.4925	1.61572	-0.540152	1.45413
	ABA-24h-Re1	26.8925	4.23812	0.172911	0.887051	0.968026	0.0712803	0.847095
	ABA-24h-Re2	26.9278	4.1827	-0.0303917	1.02129
	ABA-24h--Re3	26.9472	4.17508	0.00616455	0.995736
	CK-6h-Re1	26.0024	3.1783
	CK-6h-Re2	26.2412	3.35931
	CK-6h-Re3	26.4076	3.51645
	CK-12h-Re1	26.7264	2.36135
	CK-12h-Re2	26.7655	2.30162
	CK-12h-Re3	26.7696	2.15587
	CK-24h-Re1	26.678	4.06521
	CK-24h-Re2	26.9394	4.21309
	CK-24h-Re3	27.0611	4.16891
SlFBN3b	0h-Re1	23.864	1.47484	0	1	0.987854	0.0173572
	0h-Re2	23.9291	1.48121	0.00637817	0.995589
	0h-Re3	24.0323	1.5218	0.0469589	0.967975
	ABA-6h-Re1	25.0009	2.11662	0.622404	0.649587	1.03362	0.333646	0.824125
	ABA-6h-Re2	24.1118	1.17388	-0.324581	1.2523
	ABA-6h-Re3	24.2734	1.3209	-0.261784	1.19896
	ABA-12h-Re1	24.4449	1.05918	0.990568	0.50328	0.544136	0.0355729	4.14771e-05	**
	ABA-12h-Re2	24.6987	0.956486	0.834217	0.560887
	ABA-12h-Re3	24.7214	0.844545	0.815428	0.56824
	ABA-24h-Re1	24.2262	1.57188	0.0984745	0.93402	0.901432	0.0504459	0.048522	*
	ABA-24h-Re2	24.2655	1.52033	0.109434	0.926952
	ABA-24h--Re3	24.2711	1.49895	0.245838	0.843326
	CK-6h-Re1	24.3184	1.49422
	CK-6h-Re2	24.3804	1.49846
	CK-6h-Re3	24.4739	1.58269
	CK-12h-Re1	24.4337	0.0686092
	CK-12h-Re2	24.5862	0.122269
	CK-12h-Re3	24.6428	0.0291176
	CK-24h-Re1	24.0862	1.4734
	CK-24h-Re2	24.1372	1.41089
	CK-24h-Re3	24.1453	1.25311
SlFBN4	0h-Re1	22.1084	-0.280811	0.025156	0.982714	0.994031	0.00980585
	0h-Re2	22.1419	-0.305967	0	1
	0h-Re3	22.2054	-0.305073	0.000894547	0.99938
	ABA-6h-Re1	21.8158	-1.06846	-0.0832157	1.05938	1.03214	0.0489335	0.256554
	ABA-6h-Re2	21.833	-1.10497	-0.0859528	1.06139
	ABA-6h-Re3	21.9962	-0.956339	0.0355715	0.975645
	ABA-12h-Re1	22.2635	-1.1222	1.12541	0.458371	0.497944	0.0364713	2.21072e-05	**
	ABA-12h-Re2	22.3307	-1.4115	0.915379	0.530205
	ABA-12h-Re3	22.3883	-1.48857	0.984907	0.505258
	ABA-24h-Re1	22.2665	-0.387896	-0.0786652	1.05604	0.782934	0.249068	0.216308
	ABA-24h-Re2	23.2072	0.46204	0.815243	0.568313
	ABA-24h--Re3	22.7453	-0.026907	0.465044	0.724449
	CK-6h-Re1	21.8389	-0.985247
	CK-6h-Re2	21.8629	-1.01901
	CK-6h-Re3	21.8993	-0.991911
	CK-12h-Re1	22.1175	-2.24762
	CK-12h-Re2	22.137	-2.32688
	CK-12h-Re3	22.1402	-2.47348
	CK-24h-Re1	22.3036	-0.309231
	CK-24h-Re2	22.3731	-0.353203
	CK-24h-Re3	22.4003	-0.491951
SlFBN5	0h-Re1	22.2492	-0.140024	0.0534897	0.963603	0.98122	0.0182265
	0h-Re2	22.2834	-0.164454	0.0290604	0.980058
	0h-Re3	22.317	-0.193514	0	1
	ABA-6h-Re1	22.5483	-0.33601	-0.895792	1.86063	1.78229	0.0937681	0.000130634	**
	ABA-6h-Re2	22.6385	-0.299494	-0.854275	1.80785
	ABA-6h-Re3	22.8336	-0.118921	-0.747082	1.67839
	ABA-12h-Re1	21.8584	-1.52737	0.828148	0.563252	0.820421	0.225171	0.28513
	ABA-12h-Re2	22.0355	-1.7067	0.0259552	0.98217
	ABA-12h-Re3	22.3107	-1.5661	0.126831	0.915841
	ABA-24h-Re1	22.1088	-0.54557	-0.563778	1.47813	1.43569	0.0786322	0.000619285	**
	ABA-24h-Re2	22.383	-0.362127	-0.427563	1.34496
	ABA-24h--Re3	22.391	-0.381195	-0.569477	1.48399
	CK-6h-Re1	23.3839	0.559782
	CK-6h-Re2	23.4367	0.554781
	CK-6h-Re3	23.5193	0.62816
	CK-12h-Re1	22.0096	-2.35552
	CK-12h-Re2	22.7312	-1.73265
	CK-12h-Re3	22.9208	-1.69294
	CK-24h-Re1	22.631	0.0182076
	CK-24h-Re2	22.7917	0.0654354
	CK-24h-Re3	23.0805	0.188282
SlFBN6	0h-Re1	21.9975	-0.391672	0.0140533	0.990306	0.988564	0.0124
	0h-Re2	22.0421	-0.405725	0	1
	0h-Re3	22.1407	-0.369768	0.0359573	0.975384
	ABA-6h-Re1	18.9175	-3.96679	-0.190233	1.14095	1.10877	0.0990025	0.105231
	ABA-6h-Re2	18.9262	-4.01179	-0.248137	1.18767
	ABA-6h-Re3	19.2326	-3.71991	0.0033577	0.997675
	ABA-12h-Re1	21.4582	-1.92754	1.37422	0.385761	0.440691	0.0478194	4.32839e-05	**
	ABA-12h-Re2	21.5306	-2.21161	1.11003	0.463284
	ABA-12h-Re3	21.5401	-2.33675	1.08001	0.473027
	ABA-24h-Re1	21.2889	-1.36543	-0.6607	1.58085	1.53583	0.0838328	0.000363717	**
	ABA-24h-Re2	21.3241	-1.42106	-0.666794	1.58754
	ABA-24h--Re3	21.3403	-1.43191	-0.525175	1.43911
	CK-6h-Re1	19.0476	-3.77656
	CK-6h-Re2	19.1182	-3.76365
	CK-6h-Re3	19.1679	-3.72327
	CK-12h-Re1	21.0633	-3.30177
	CK-12h-Re2	21.1422	-3.32164
	CK-12h-Re3	21.1969	-3.41676
	CK-24h-Re1	21.9081	-0.704733
	CK-24h-Re2	21.972	-0.754265
	CK-24h-Re3	21.9855	-0.906733
SlFBN7a	0h-Re1	23.3365	0.947294	0.109474	0.926926	0.96358	0.0365376
	0h-Re2	23.3389	0.890993	0.0531731	0.963814
	0h-Re3	23.3483	0.83782	0	1
	ABA-6h-Re1	23.385	0.500753	-0.0814075	1.05805	1.06561	0.0446456	0.0375392	*
	ABA-6h-Re2	23.4198	0.481865	-0.15517	1.11355
	ABA-6h-Re3	23.5701	0.617651	-0.035944	1.02523
	ABA-12h-Re1	23.6789	0.293135	0.77557	0.584158	0.640391	0.0497	0.000817427	**
	ABA-12h-Re2	23.7504	0.00812912	0.559731	0.678429
	ABA-12h-Re3	23.8135	-0.0633278	0.602552	0.658588
	ABA-24h-Re1	23.8237	1.16932	0.12332	0.918073	0.881827	0.047902	0.0784834
	ABA-24h-Re2	23.8316	1.08643	0.152184	0.899887
	ABA-24h--Re3	23.8479	1.07576	0.273134	0.82752
	CK-6h-Re1	23.4063	0.582161
	CK-6h-Re2	23.5189	0.637035
	CK-6h-Re3	23.5448	0.653595
	CK-12h-Re1	23.8827	-0.482435
	CK-12h-Re2	23.9123	-0.551601
	CK-12h-Re3	23.9478	-0.66588
	CK-24h-Re1	23.6588	1.046
	CK-24h-Re2	23.6605	0.934242
	CK-24h-Re3	23.6949	0.802629
SlFBN7b	0h-Re1	23.823	1.43383	0	1	1.02186	0.018943
	0h-Re2	23.836	1.38815	-0.0456715	1.03216
	0h-Re3	23.8969	1.3864	-0.0474281	1.03342
	ABA-6h-Re1	23.6652	0.780943	-0.0178185	1.01243	1.04195	0.0363478	0.443852
	ABA-6h-Re2	23.6779	0.739914	-0.0438557	1.03087
	ABA-6h-Re3	23.6818	0.729305	-0.114426	1.08254
	ABA-12h-Re1	24.1946	0.808856	1.05004	0.482955	0.685652	0.183608	0.0343537	*
	ABA-12h-Re2	23.702	-0.0402195	0.250115	0.840829
	ABA-12h-Re3	23.9506	0.0737572	0.447775	0.733173
	ABA-24h-Re1	24.1662	1.51189	0.146591	0.903382	0.910488	0.00770525	0.000704231	**
	ABA-24h-Re2	24.2003	1.45518	0.137007	0.909404
	ABA-24h--Re3	24.069	1.29683	0.122369	0.918678
	CK-6h-Re1	23.6229	0.798761
	CK-6h-Re2	23.6657	0.78377
	CK-6h-Re3	23.7349	0.843731
	CK-12h-Re1	24.1239	-0.241182
	CK-12h-Re2	24.1736	-0.290335
	CK-12h-Re3	24.2397	-0.374018
	CK-24h-Re1	23.9781	1.3653
	CK-24h-Re2	24.0445	1.31817
	CK-24h-Re3	24.0667	1.17446
SlFBN8	0h-Re1	22.707	0.317808	0	1	0.979015	0.0264869
	0h-Re2	22.7834	0.335531	0.0177231	0.98779
	0h-Re3	22.9034	0.392942	0.0751343	0.949254
	ABA-6h-Re1	22.7806	-0.103641	-0.342265	1.26775	1.14022	0.111184	0.0709829
	ABA-6h-Re2	23.051	0.113016	-0.0889778	1.06362
	ABA-6h-Re3	23.0662	0.113722	-0.123402	1.0893
	ABA-12h-Re1	23.3059	-0.0798149	0.927294	0.525844	0.589511	0.0555126	0.000392548	**
	ABA-12h-Re2	23.352	-0.390234	0.701569	0.614903
	ABA-12h-Re3	23.3989	-0.47789	0.671654	0.627787
	ABA-24h-Re1	22.9141	0.259729	-0.0542431	1.03831	1.03609	0.0518058	0.164559
	ABA-24h-Re2	22.9366	0.191465	-0.12001	1.08674
	ABA-24h--Re3	22.954	0.181824	0.0244389	0.983203
	CK-6h-Re1	23.0628	0.238625
	CK-6h-Re2	23.0839	0.201994
	CK-6h-Re3	23.1283	0.237123
	CK-12h-Re1	23.358	-1.00711
	CK-12h-Re2	23.3721	-1.0918
	CK-12h-Re3	23.4642	-1.14954
	CK-24h-Re1	22.9268	0.313972
	CK-24h-Re2	23.0378	0.311476
	CK-24h-Re3	23.0496	0.157385
SlFBN9	0h-Re1	23.6621	1.27294	0	1	0.918518	0.0705703
	0h-Re2	23.9075	1.45964	0.186707	0.878609
	0h-Re3	23.9729	1.46238	0.189442	0.876945
	ABA-6h-Re1	24.2679	1.38361	-0.0575161	1.04067	0.981963	0.0630994	0.310276
	ABA-6h-Re2	24.3807	1.44279	0.014534	0.989976
	ABA-6h-Re3	24.5365	1.58403	0.127779	0.915239
	ABA-12h-Re1	24.3533	0.967609	0.736935	0.600013	0.667296	0.0595034	0.00921328	**
	ABA-12h-Re2	24.4297	0.687439	0.537676	0.68888
	ABA-12h-Re3	24.4504	0.57358	0.488035	0.712995
	ABA-24h-Re1	23.5246	0.870253	-0.27457	1.20963	1.09247	0.162299	0.16389
	ABA-24h-Re2	23.5705	0.825331	-0.214813	1.16055
	ABA-24h--Re3	23.8319	1.05978	0.140482	0.907216
	CK-6h-Re1	24.2653	1.44112
	CK-6h-Re2	24.3101	1.42825
	CK-6h-Re3	24.3474	1.45625
	CK-12h-Re1	24.5958	0.230675
	CK-12h-Re2	24.6137	0.149763
	CK-12h-Re3	24.6993	0.0855446
	CK-24h-Re1	23.7576	1.14482
	CK-24h-Re2	23.7664	1.04014
	CK-24h-Re3	23.8115	0.9193
SlFBN10	0h-Re1	25.8551	3.4659	0.0277195	0.98097	0.989621	0.00963204
	0h-Re2	25.9036	3.45575	0.0175724	0.987894
	0h-Re3	25.9487	3.43818	0	1
	ABA-6h-Re1	24.7531	1.86878	-0.0424805	1.02988	1.04379	0.013207	0.00456603	**
	ABA-6h-Re2	24.8279	1.89	-0.0639343	1.04531
	ABA-6h-Re3	24.8667	1.91422	-0.0788345	1.05616
	ABA-12h-Re1	25.2114	1.82567	0.604794	0.657565	0.77267	0.100171	0.0202251	*
	ABA-12h-Re2	25.2138	1.47154	0.285696	0.820346
	ABA-12h-Re3	25.259	1.38222	0.251371	0.840097
	ABA-24h-Re1	26.841	4.18669	0.571209	0.673053	0.633625	0.0491907	0.000250869	**
	ABA-24h-Re2	26.8792	4.13405	0.622995	0.649321
	ABA-24h--Re3	26.9323	4.16013	0.789606	0.578502
	CK-6h-Re1	24.7354	1.91126
	CK-6h-Re2	24.8358	1.95393
	CK-6h-Re3	24.8842	1.99306
	CK-12h-Re1	25.586	1.22087
	CK-12h-Re2	25.6497	1.18584
	CK-12h-Re3	25.7446	1.13085
	CK-24h-Re1	26.2283	3.61548
	CK-24h-Re2	26.2373	3.51105
	CK-24h-Re3	26.2628	3.37052
SlFBN11	0h-Re1	21.5544	-0.834772	0.0292416	0.979935	0.98177	0.0173858
	0h-Re2	21.6347	-0.813173	0.0508404	0.965374
	0h-Re3	21.6465	-0.864014	0	1
	ABA-6h-Re1	22.6831	-0.2012	0.963123	0.512945	0.518303	0.00492667	1.53546e-06	**
	ABA-6h-Re2	22.701	-0.236954	0.936115	0.522638
	ABA-6h-Re3	22.7799	-0.172642	0.945292	0.519325
	ABA-12h-Re1	19.8809	-3.50485	-4.52324	22.9949	27.0449	3.77582	0.000280464	**
	ABA-12h-Re2	19.9019	-3.84034	-4.79034	27.6718
	ABA-12h-Re3	19.9142	-3.96263	-4.92923	30.4681
	ABA-24h-Re1	21.0956	-1.5587	-3.33741	10.1079	9.73454	0.902111	7.35364e-05	**
	ABA-24h-Re2	21.1359	-1.60926	-3.37713	10.39
	ABA-24h--Re3	21.2614	-1.51076	-3.12196	8.70568
	CK-6h-Re1	21.6598	-1.16432
	CK-6h-Re2	21.7088	-1.17307
	CK-6h-Re3	21.7733	-1.11793
	CK-12h-Re1	25.3835	1.01839
	CK-12h-Re2	25.4139	0.950006
	CK-12h-Re3	25.5803	0.966597
	CK-24h-Re1	24.3915	1.77871
	CK-24h-Re2	24.4942	1.76786
	CK-24h-Re3	24.5034	1.6112
SlActin	0h-Re1	22.3892
	0h-Re2	22.4479
	0h-Re3	22.5105
	CK-6h-Re1	22.8241
	CK-6h-Re2	22.8819
	CK-6h-Re3	22.8912
	CK-12h-Re1	24.3651
	CK-12h-Re2	24.4639
	CK-12h-Re3	24.6137
	CK-24h-Re1	22.6128
	CK-24h-Re2	22.7263
	CK-24h-Re3	22.8922
	ABA-6h-Re1	22.8843
	ABA-6h-Re2	22.9379
	ABA-6h-Re3	22.9525
	ABA-12h-Re1	23.3857
	ABA-12h-Re2	23.7422
	ABA-12h-Re3	23.8768
	ABA-24h-Re1	22.6543
	ABA-24h-Re2	22.7451
	ABA-24h--Re3	22.7722
